# Supplementary material
Source: PubMed Central journal article supplement (PMC2567408)
Supplement: emboj2008178s1.pdf [file emboj2008178s1.pdf]

**Figure S1**

**(A)** Increased migration of MCF7 and MTfIEcad cells upon loss of E-cadherin (shEcad and MTdeltaEcad, respectively). \* $p < 0.0001$  and \*\* $p = 0.0236$ , unpaired t-test. Data are shown as mean  $\pm$  SD.

**(B)** shRNA-mediated depletion of E-cadherin (shEcad) induces invasion of MCF7 cells. \*\*\* $p = 0.0186$ , two sided t-test. Data are shown as mean  $\pm$  SD.

**(C)** Epithelial-mesenchymal transition reduces the proliferation rates of NMuMG, MCF7 and MTfIEcad NMuMG cells. Cell numbers were measured using an MTT assay.

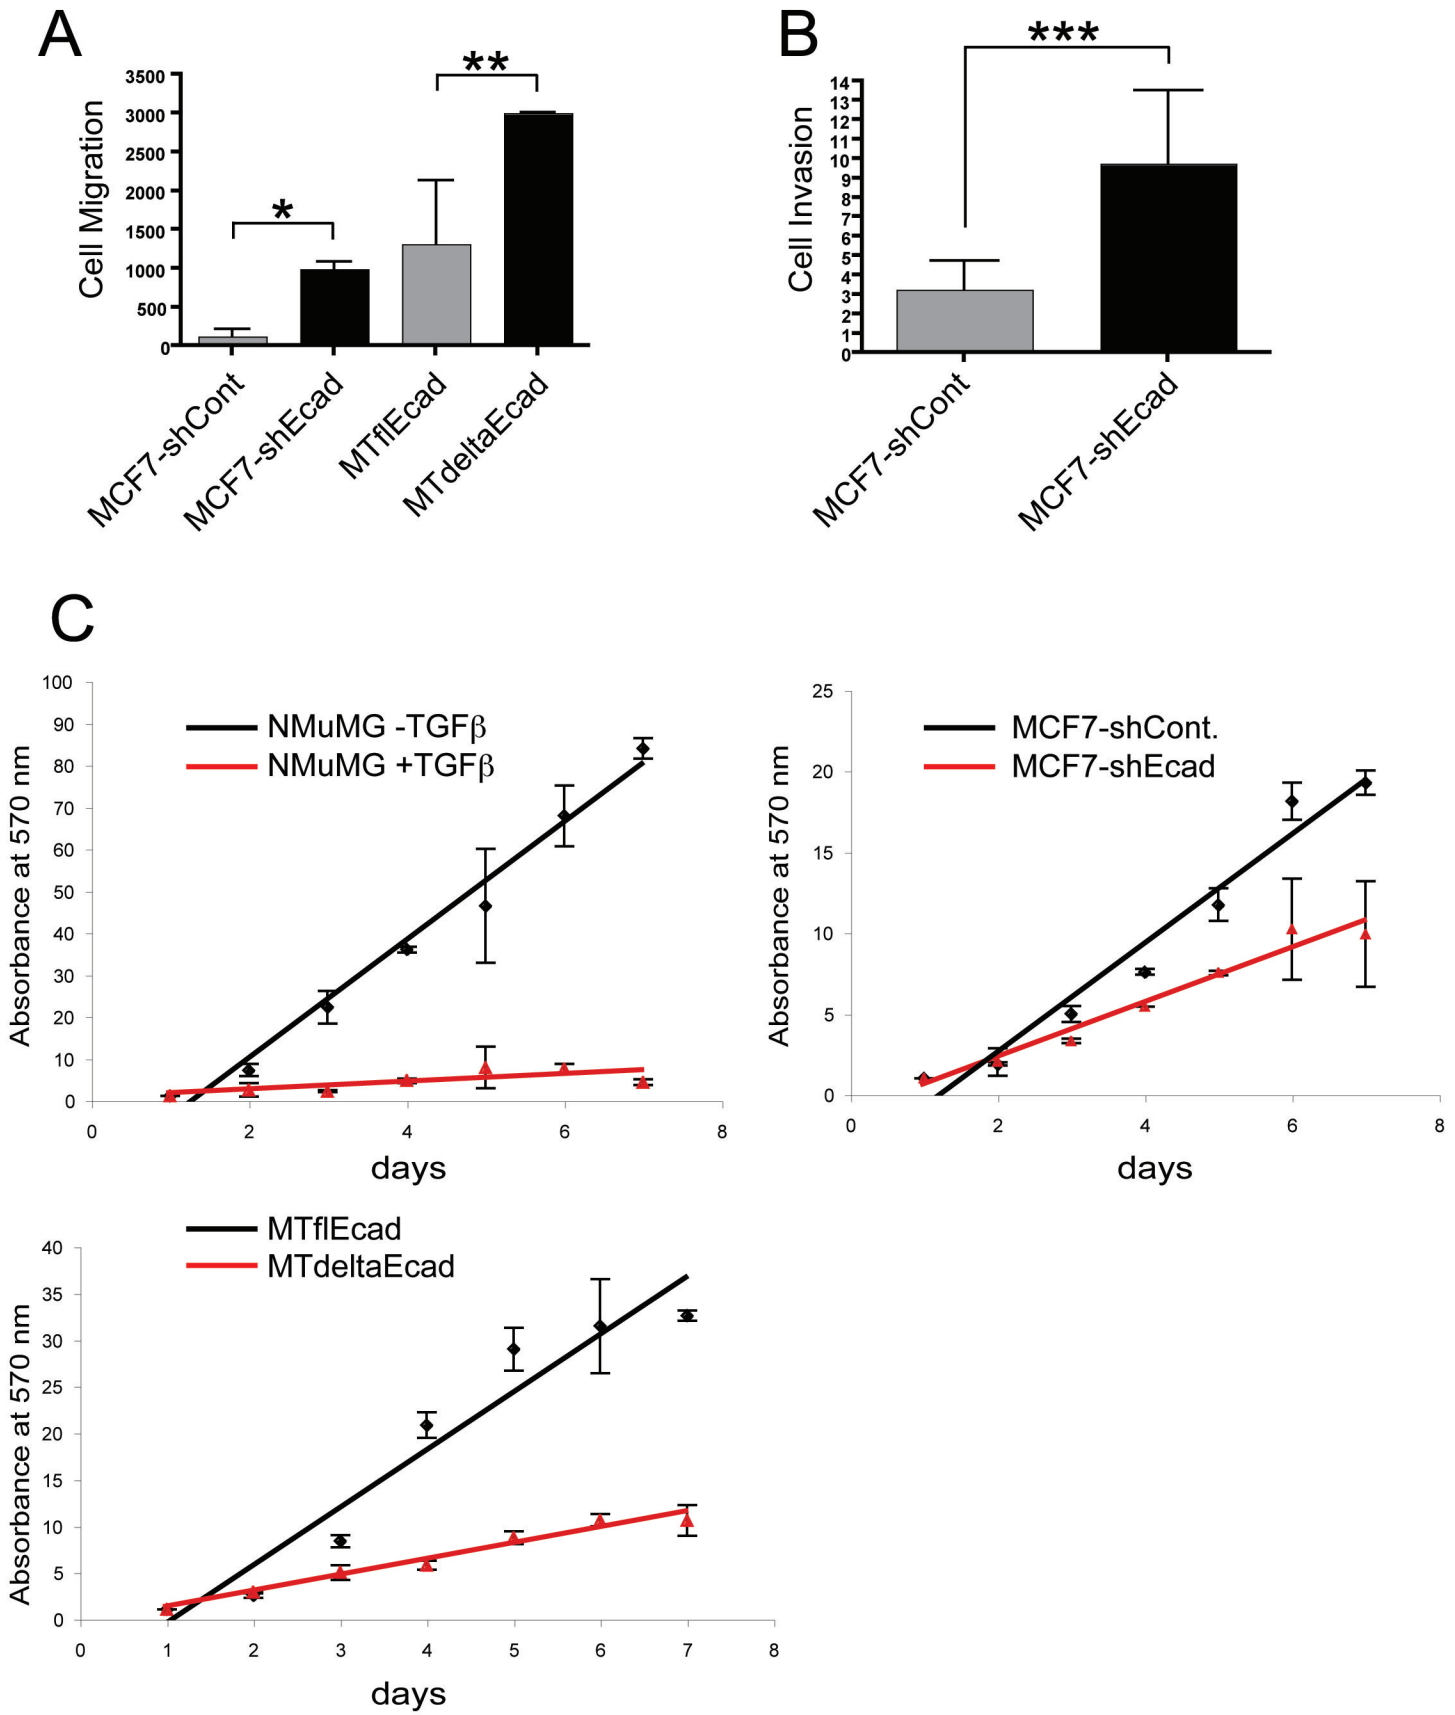

**Figure S2**

NCAM promoter activity is increased upon loss of E-cadherin.

**(A)** MCF7 cells expressing E-cadherin or depleted for E-cadherin expression were transfected with a CAT reporter plasmid containing 1000 bp ( $\Delta$ Ssp) or 647 bp ( $\Delta$ Nde) of the NCAM promoter sequence, and CAT activity was determined 48 hours after transfection (\* $p = 0.0114$  and \*\* $p = 0.0374$ ). Data are shown as mean $\pm$ SD.

**(B)** MTfIEcad cells carrying floxed alleles of the E-cadherin gene were treated with purified recombinant Cre-recombinase fused to a HIV-Tat entry peptide to ablate the E-cadherin alleles by recombination/excision. RNA was extracted at the time points of treatment as indicated, and the relative expression levels of NCAM and E-cadherin were determined by quantitative RT-PCR.

**A**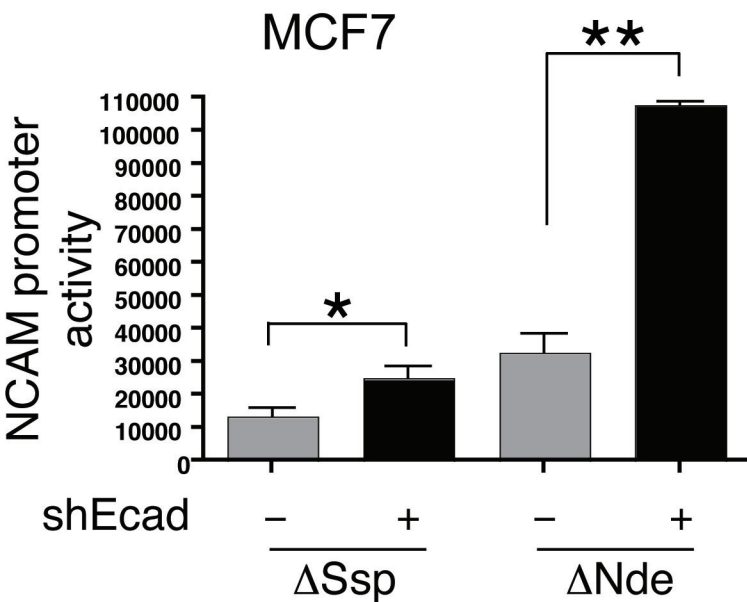**B**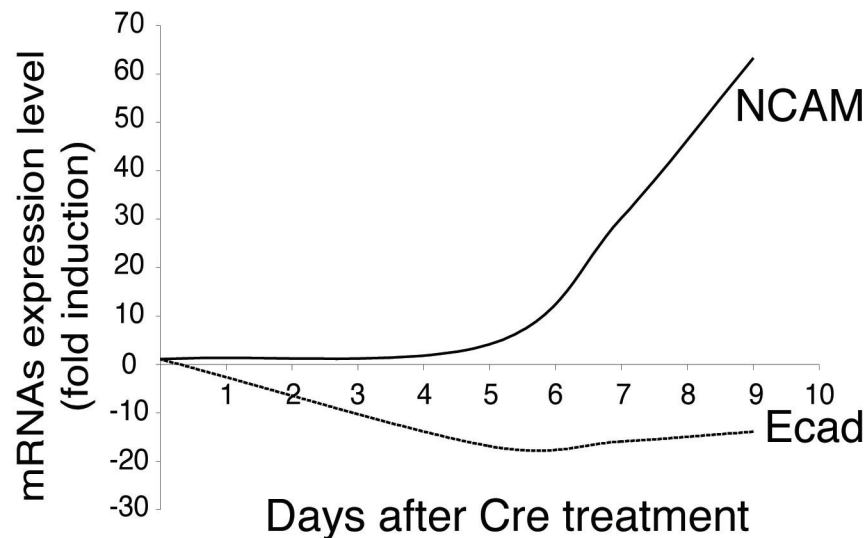

**Figure S3**

Loss of E-cadherin expression in HEK293-shEcad cells.

**(A)** Phase contrast micrographs of HEK293 cells stably expressing a control shRNA (shCont, left panel) or an E-cadherin-specific shRNA (right panel).

**(B)** Immunoblotting analysis of E-cadherin (Ecad), NCAM,  $\beta$ -catenin, and vimentin expression in HEK293-shCont and HEK293-shEcad cells. Immunoblotting for vinculin was used as loading control.

**(C)** Scratch wounding assay on confluent layers of HEK293-shCont and HEK293-shEcad cells. 42 hours after wounding, phase contrast microphotographs were taken. Note that within this period, HEK293-shEcad cells had almost closed the gap, while HEK293-shCont cells had migrated less.

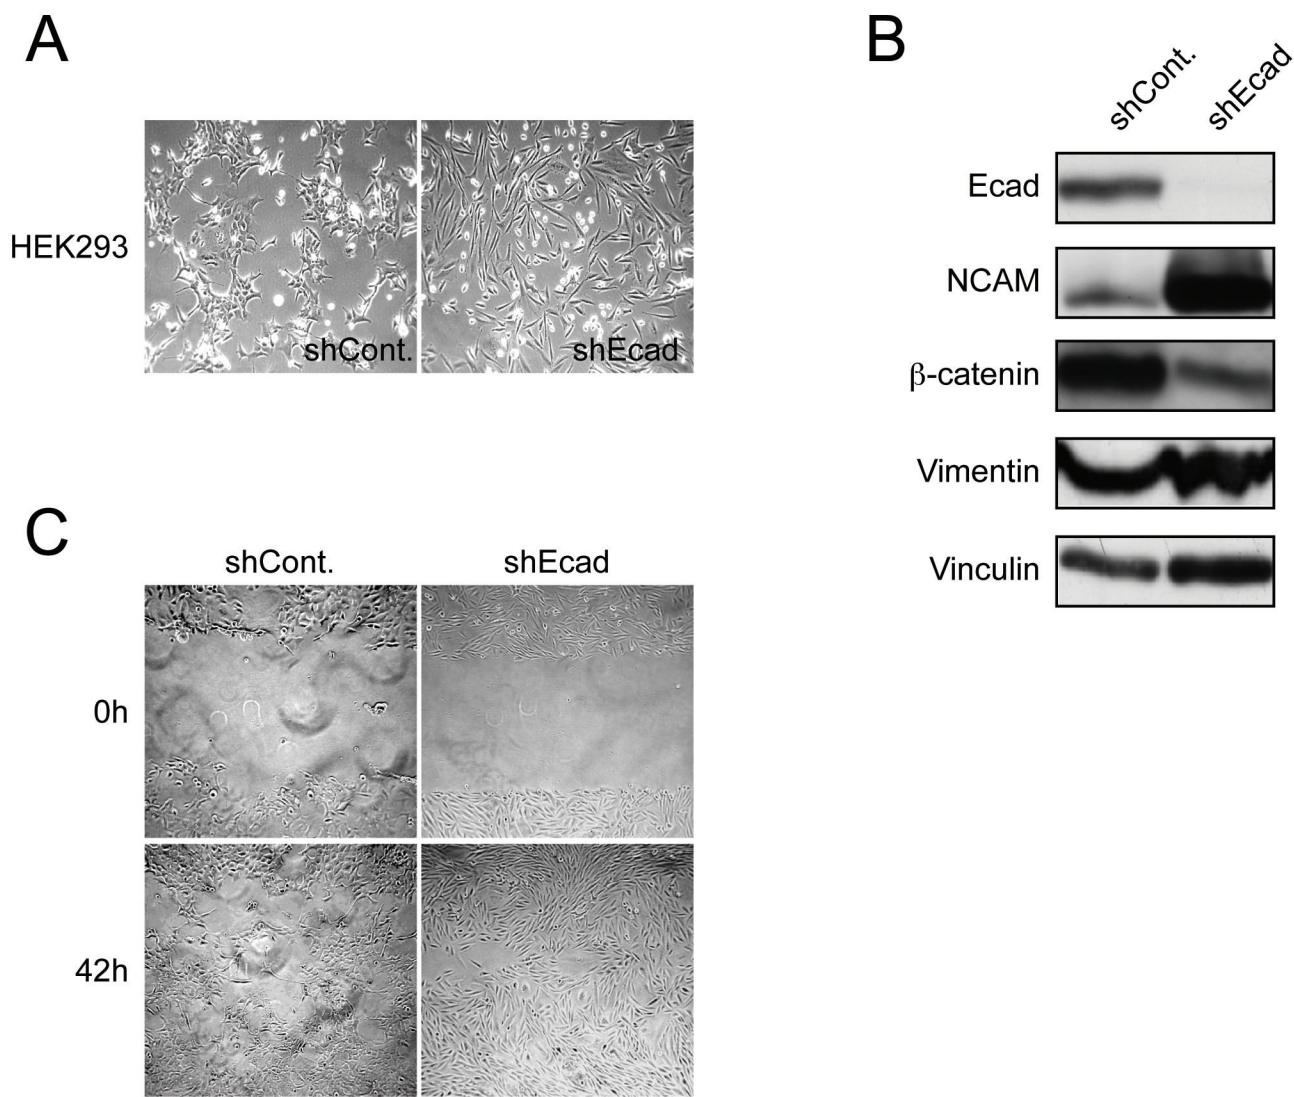



**Figure S4**

E-cadherin deletion in  $\beta$  cells of the islets of Langerhans leads to increased NCAM expression in normal tissues. Immunofluorescence staining for E-cadherin (**green; A, D, E**) and for NCAM (**red; C, D, F**) in a pancreatic section from a E-cad F/F;RipCre mouse as indicated. E and F represent higher magnifications of the boxes in panels A and C, respectively. Single  $\beta$  cells that have lost E-cadherin expression and gained high levels of NCAM expression are indicated by arrows. Nuclei are stained with DAPI (blue).

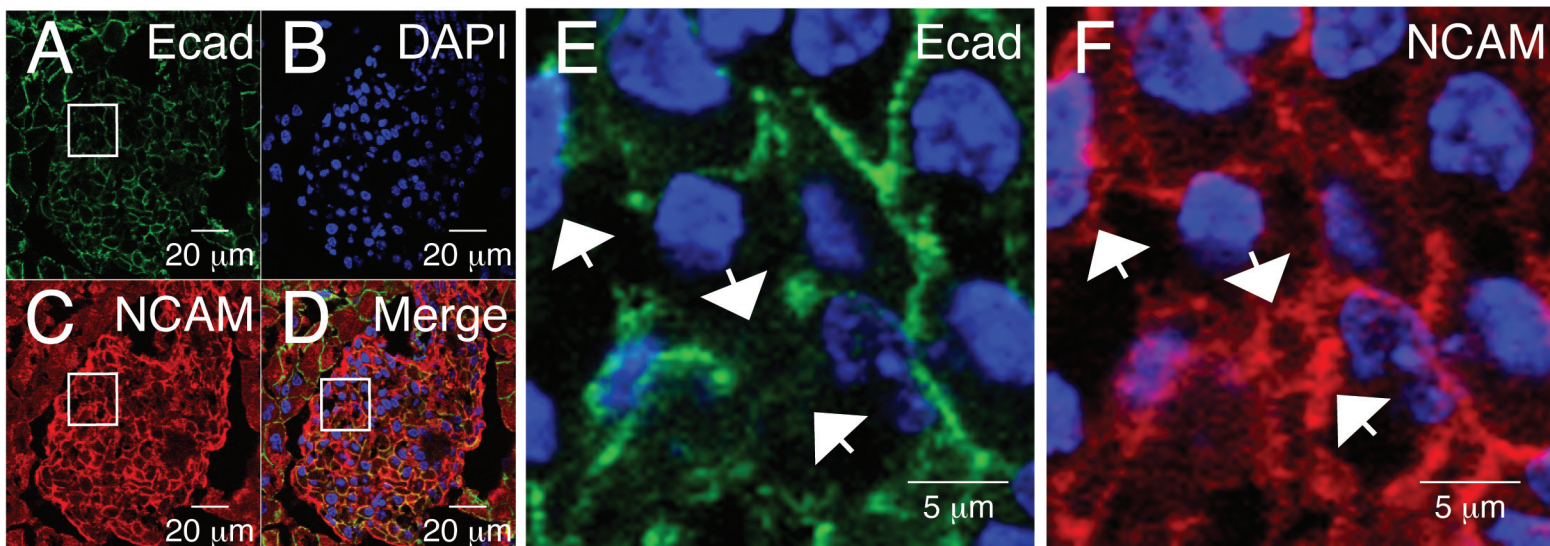



**Figure S5**

NCAM depletion increases cell migration

Scratch wounding assay on confluent layers of NMuMG cells transfected with siControl or siNCAM siRNA and treated with TGF $\beta$ . 24 hours after wounding, phase contrast microphotographs were taken. Note that within this time period, siNCAM-transfected cells had almost closed the gap, while the siControl cells had migrated less.

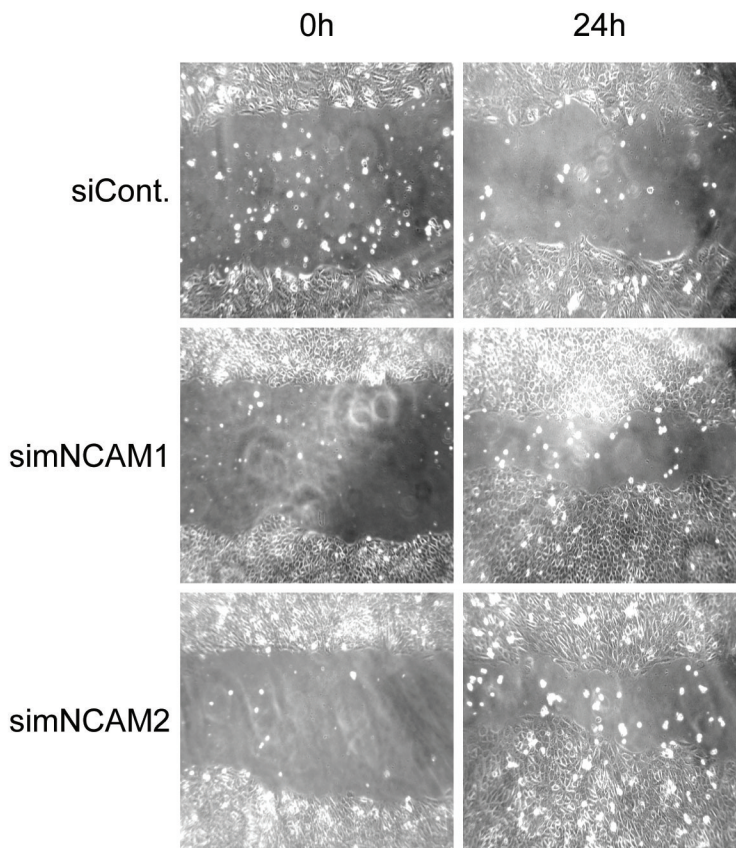

**Figure S6**

Characterization of siRNA targeting mouse and human NCAM.

**(A)** Immunoblotting analysis of MTdeltaEcad cells transfected for 48 hours with mouse NCAM-specific siRNA targeting NCAM or with mismatch control siRNA. Immunoblotting for vinculin was used as loading control.

**(B and C)** HEK293 and HEK293-shEcad and MCF7-shEcad cells **(D)** were transfected for the indicated times with 3 independent siRNA targeting human NCAM or with mismatch control siRNA (siCont) and analyzed by immunoblotting (upper panels) or quantitative RT-PCR (lower panels) for NCAM expression. Mouse riboprotein L19 primers were used for normalization, and fold induction was calculated against siControl-treated cells using the comparative Ct method ( $\Delta\Delta Ct$ ). \* $p < 0.01$ , unpaired t-test. Data are shown as mean  $\pm$  SD.

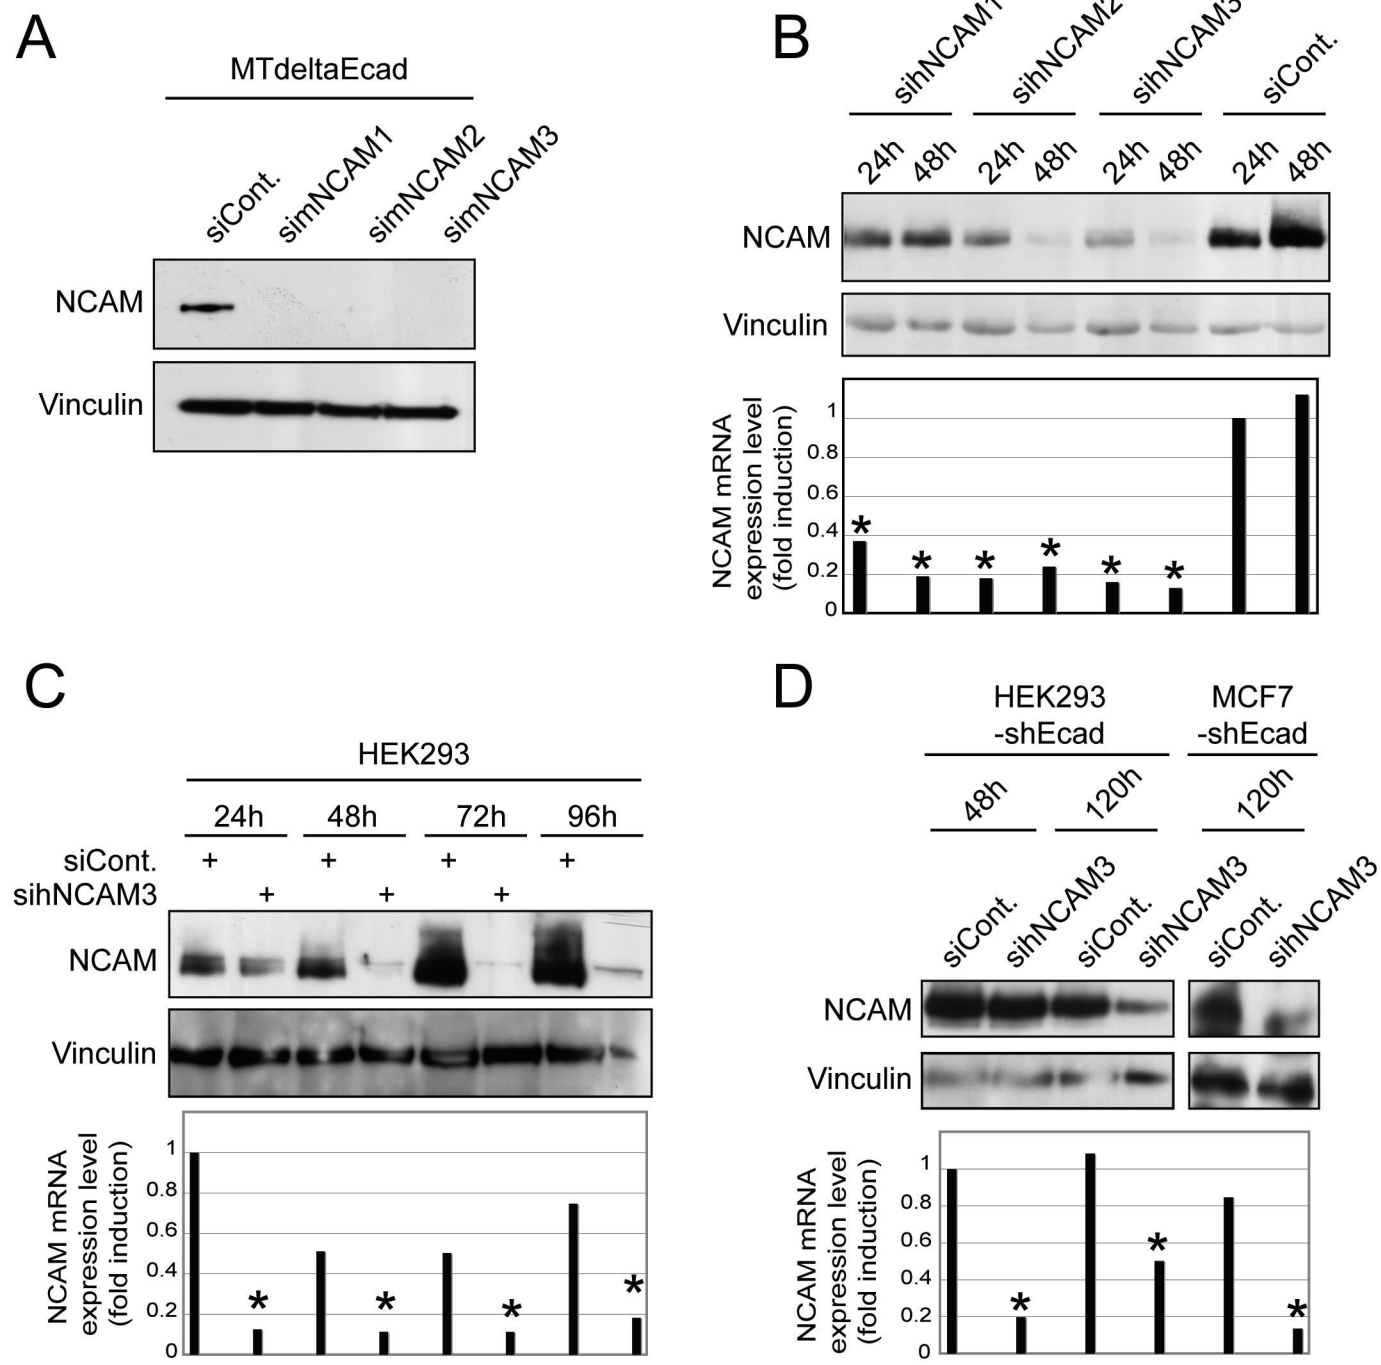

**Figure S7**

High levels of NCAM140 associate with lipid rafts.

**(A)** HEK293 cells expressing NCAM under the control of the Tetracycline-inducible system (HEK293-FlpInTrex-NCAM) were either grown in the absence of Doxycycline (non-induced) or in the presence of Doxycycline (induced) to induce expression of NCAM. Lysates of the cells were fractionated by sucrose gradient centrifugation and analyzed by immunoblotting for NCAM, phosphorylated-p59Fyn, p59Fyn and vinculin, as indicated. In cells expressing high levels of NCAM (induced), NCAM, p59Fyn and FAK are present in lipid rafts (0 and 20% sucrose) as well as in the Triton X-100 soluble high-density fractions (30, 35, and 40% sucrose). In cells expressing low levels of NCAM, they are only detected in the high-density fractions (30, 35, and 40% sucrose). **(B)** Expression levels of E-cadherin remain unchanged upon induced expression of NCAM. HEK293-FlpInTrex-NCAM and HEK293-FlpInTrex-GFP cells were induced with doxycycline to express NCAM and GFP, respectively, and NCAM and E-cadherin levels were determined by immunoblotting at the time points indicated. Tubulin served as loading control.

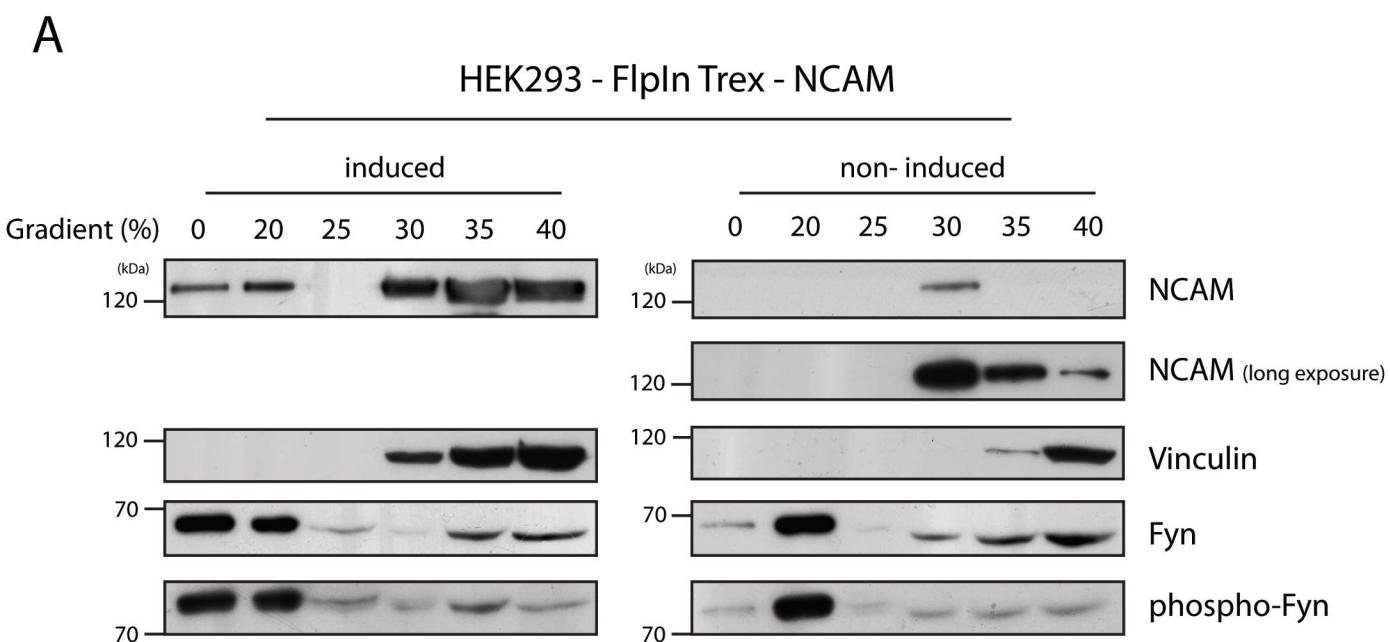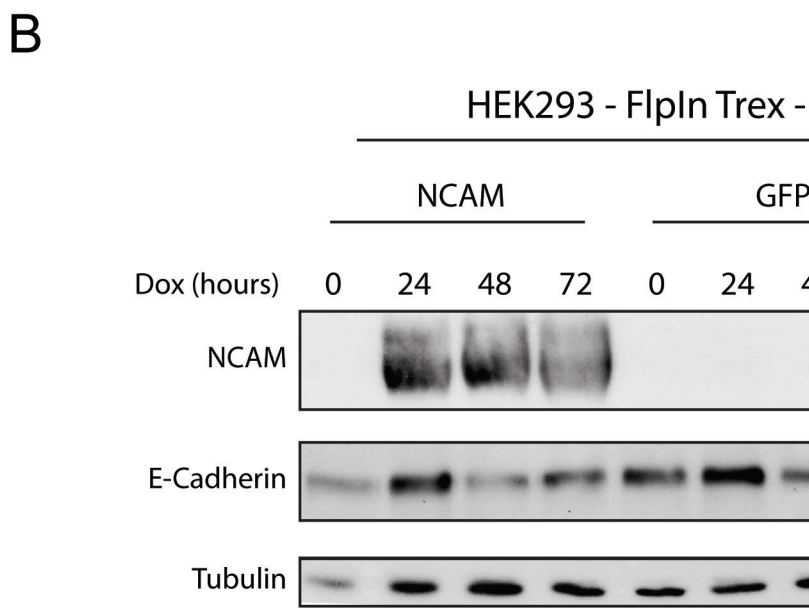



**Table S1**

Oligonucleotides used for quantitative SYBR green RT-PCR, siRNA and shRNA experiments.

| <b>qPCR primers</b> | <b>Forward</b>                                                           | <b>Reverse</b>                                                          |
|---------------------|--------------------------------------------------------------------------|-------------------------------------------------------------------------|
| human NCAM          | ACCCATTCCCTCCATCAC                                                       | GTGCCATCCAGAGTCTCTTG                                                    |
| mouse NCAM          | CAGGAGTCCTTGGAATTCATCC                                                   | TGGAGAAGACGGTGTGTCTGC                                                   |
| human RPL19         | GATGCCGGAAAAACACCTTG                                                     | TGGCTGTACCCTTCCGCTT                                                     |
| <b>siRNAs</b>       | <b>Sense</b>                                                             | <b>Anti-sense</b>                                                       |
| mNCAM1              | GAACUGCAGUUUCCCUGCAGGUAGA                                                | UCUACCUGCAGGGAAACUGCAGUUC                                               |
| mNCAM2              | CCGAAUACGUCUGCAUCGCAGAGAA                                                | UUCUCUGCGAUGCAGACGUCUUCGG                                               |
| mNCAM3              | CCAUCAGACACUAUCUGGUCAAGUA                                                | UACUUGACCAGAUAGUGUCUGAUGG                                               |
| hNCAM1              | UUCACUGCAGUACAGUUGUAGUUC                                                 | GGAACUACAACUGUACUGCAGUGAA                                               |
| hNCAM2              | UACCUGACCAGAUAGUGUCUGAUGG                                                | CCAUCAGACACUAUCUGGUCAAGUA                                               |
| hNCAM3              | UUGACCGCAAUGCACAUGAACAGGC                                                | GCCUGUUCAUGUGCAUUGC GGUCAA                                              |
| <b>shRNA</b>        | <b>Sense</b>                                                             | <b>Anti-sense</b>                                                       |
| shEcad              | GATCCCCATCTGAAAGCGGCTGATAC<br>TTCAAGAGAGTATCAGCCGCTTTCAG<br>ATTTTTTGAAA  | AGCTTTTCCAAAAAATCTGAAAGCGGC<br>TGATATCTCTTGAAGTATCAGCCGCTT<br>TCAGATGGG |
| shmNCAM control     | GATCCCCGTACAAGGCTGAGTGGAA<br>GTTCAAGAGACTTCCACTCAGCCTTG<br>TACTTTTTTGAAA | AGCTTTTCCAAAAAGTACAAGGCTGAG<br>TGGAAGTCTCTTGAAGTCCACTCAGC<br>CTTGTACGGG |
